# Supplementary material
Source: PubMed Central journal article supplement (PMC7024942)
Supplement: mmc1.pdf [file mmc1.pdf]

## SBST- STarT Back Screening Tool – Spanish National Translation Procedure

| SBST international version                                                                                                                | Forward Translation 1                                                                                                                                 | Forward Translation2                                                                                                                                          | Reconciliation                                                                                   | Version 1                                                                                                                                                                                                       | Patient testing, Discussion and amendment                                   | Version 2                                                                                                                                                                                                    | Backward Translation to English                                                                                                                      |
|-------------------------------------------------------------------------------------------------------------------------------------------|-------------------------------------------------------------------------------------------------------------------------------------------------------|---------------------------------------------------------------------------------------------------------------------------------------------------------------|--------------------------------------------------------------------------------------------------|-----------------------------------------------------------------------------------------------------------------------------------------------------------------------------------------------------------------|-----------------------------------------------------------------------------|--------------------------------------------------------------------------------------------------------------------------------------------------------------------------------------------------------------|------------------------------------------------------------------------------------------------------------------------------------------------------|
| For each of the following, please cross one box to show whether you agree or disagree with the statement, thinking about the last 2 weeks | Para cada una de las afirmaciones, por favor marca en el cuadro para mostrar tu acuerdo o desacuerdo con el estado, pensando en las últimas 2 semanas | Para cada afirmación, por favor haga una cruz en una casilla para mostrar si está de acuerdo o desacuerdo con el estado, pensando sobre las 2 últimas semanas |                                                                                                  | Para cada una de las siguientes afirmaciones, por favor haga una cruz en una casilla para mostrar si está de acuerdo o en desacuerdo con la afirmación, pensando <b>sobre</b> las últimas dos semanas.          | “En las”                                                                    | Para cada una de las siguientes afirmaciones, por favor haga una cruz en una casilla para mostrar si está de acuerdo o en desacuerdo con la afirmación, pensando <b>en las</b> últimas dos semanas.          | For each of the following, please cross one box to show whether you agree or disagree with the statement, thinking about the last 2 weeks            |
| My back pain has spread down my leg (s) at some time in the last 2 weeks                                                                  | Mi dolor de espalda se ha extendido por debajo de mi pierna en algún tiempo en las últimas 2 semanas                                                  | Mi dolor de espalda se ha irradiado por mi pierna en alguna ocasión en las últimas dos semanas                                                                | “Se ha irradiado”                                                                                | Mi dolor de espalda <b>se ha irradiado</b> a lo largo de mi pierna(s) en alguna ocasión en las últimas dos semanas<br><b>He tenido dolor</b> en el hombro o cuello en alguna ocasión en las últimas dos semanas | “ Se ha extendido”                                                          | Mi dolor de espalda <b>se ha extendido</b> a lo largo de mi pierna(s) en alguna ocasión en las últimas dos semanas<br><b>Me ha dolido</b> en el hombro o cuello en alguna ocasión en las últimas dos semanas | My back pain has spread down my leg (s) at some time in the last 2 weeks<br>I have had pain in the shoulder or neck at some time in the last 2 weeks |
| I have had pain in the shoulder or neck at some time in the last 2 weeks                                                                  | Yo he tenido dolor en el hombro o cuello en algún tiempo en las últimas 2 semanas                                                                     | He tenido dolor en el hombro o en el cuello en alguna ocasión en las últimas dos semanas                                                                      | “He tenido dolor”                                                                                |                                                                                                                                                                                                                 | “Me ha dolido”                                                              |                                                                                                                                                                                                              |                                                                                                                                                      |
| In the last 2 weeks, I have only walked short distances because of my back pain                                                           | En las últimas dos semanas, yo sólo he andado cortas distancias a causa de mi dolor de espalda                                                        | En las dos últimas semanas sólo he caminado distancias cortas por mi dolor de espalda                                                                         | “Debido a”                                                                                       | En las últimas dos semanas, solo he caminado distancias cortas <b>debido a</b> mi dolor de espalda                                                                                                              | “Por”                                                                       | En las últimas dos semanas, solo he caminado distancias cortas <b>por</b> mi dolor de espalda                                                                                                                | In the last 2 weeks, I have only walked short distances because of my back pain                                                                      |
| In the last 2 weeks, I have dressed more slowly than usual because of my back pain                                                        | En las últimas dos semanas, yo me he vestido más lento que usualmente a causa de mi dolor de espalda                                                  | En las últimas dos semanas, me he vestido más lentamente de lo usual debido a mi dolor de espalda                                                             | “Usual debido a”                                                                                 | En las últimas dos semanas, me he vestido más lentamente de lo <b>usual debido a</b> mi dolor de espalda                                                                                                        | “Normal” “por”                                                              | En las últimas dos semanas, me he vestido más lentamente de lo <b>normal por</b> mi dolor de espalda                                                                                                         | In the last 2 weeks, I have dressed more slowly than usual because of my back pain                                                                   |
| It’s really not safe for a person with a condition like mine to be physically active                                                      | Es realmente no seguro para una persona con una condición como la mía ser físicamente activo                                                          | No es realmente seguro para una persona con una condición como la mía ser físicamente activo                                                                  | “No es realmente seguro para una persona con una condición como la mía ser físicamente activo”   | <b>No es realmente seguro para una persona en una condición como la mía ser físicamente activa</b>                                                                                                              | “No es seguro ser físicamente activo con dolor de espalda”                  | <b>“No es seguro ser físicamente activo con dolor de espalda”</b>                                                                                                                                            | It’s really not safe for a person with back pain like mine to be physically active                                                                   |
| Worrying thoughts have been going through my mind a lot of the time in the last 2 weeks                                                   | Preocupaciones han estado pasando a través de mi mente un montón de tiempo en las últimas 2 semanas                                                   | Preocupaciones han estado pasando a través de mi mente por mucho tiempo en las últimas 2 semanas                                                              | Preocupaciones han estado pasando a través de mi mente por mucho tiempo en las últimas 2 semanas | <b>Preocupaciones han estado pasando a través de mi mente durante mucho tiempo en las últimas dos semanas</b>                                                                                                   | “Me he preocupado mucho por mi dolor de espalda en las dos últimas semanas” | “Me he preocupado mucho por mi dolor de espalda en las dos últimas semanas”                                                                                                                                  | I have been worried due to my back pain in the last two weeks                                                                                        |
| I feel that my back pain is terrible and that it’s never going to get any better                                                          | Yo siento que mi dolor de espalda es terrible y éste nunca va a conseguir ser mejor.                                                                  | Siento que mi dolor de espalda es terrible y que nunca irá a mejor                                                                                            | Noto que mi dolor de espalda es terrible y que nunca irá a mejor                                 | Noto que mi dolor de espalda es terrible y que nunca irá a mejor                                                                                                                                                |                                                                             | Noto que mi dolor de espalda es terrible y que nunca irá a mejor                                                                                                                                             | I feel that my back pain is terrible and that it’s never going to get any better                                                                     |
| In general in the last 2 weeks, I have not enjoyed all the things I used to enjoy                                                         | En general en las últimas dos semanas, yo no he disfrutado de todas las cosas como usualmente disfruto                                                | En general en las 2 últimas semanas, no he disfrutado de las cosas como normalmente disfruto                                                                  | “Que habitualmente disfruto”                                                                     | En general en las dos últimas semanas, no he disfrutado de las cosas lo <b>que habitualmente disfruto</b>                                                                                                       |                                                                             | En general en las dos últimas semanas, no he disfrutado de las cosas lo que habitualmente disfruto                                                                                                           | In general in the last 2 weeks, I have not enjoyed all the things I used to enjoy                                                                    |
| Agree                                                                                                                                     | De acuerdo                                                                                                                                            | De acuerdo                                                                                                                                                    |                                                                                                  | De acuerdo                                                                                                                                                                                                      |                                                                             | De acuerdo                                                                                                                                                                                                   | Agree                                                                                                                                                |
| Disagree                                                                                                                                  | Desacuerdo                                                                                                                                            | Desacuerdo                                                                                                                                                    |                                                                                                  | Desacuerdo                                                                                                                                                                                                      |                                                                             | Desacuerdo                                                                                                                                                                                                   | Disagree                                                                                                                                             |
| Overall, how bothersome has your back pain in the last 2 weeks                                                                            | Globalmente, como de molesto ha sido tu dolor de espalda en las últimas dos semanas                                                                   | En general, como le ha dolido su espalda en las últimas dos semanas                                                                                           | “Estado molestando”                                                                              | En general, como le ha <b>estado molestando</b> su espalda en las últimas dos semanas                                                                                                                           | “Molestado”                                                                 | En general, como le ha <b>molestado</b> su espalda en las últimas dos semanas                                                                                                                                | Overall, how bothersome has your back pain in the last 2 weeks                                                                                       |
| Not at all                                                                                                                                | En absoluto                                                                                                                                           | Nada                                                                                                                                                          |                                                                                                  | Nada                                                                                                                                                                                                            |                                                                             | Nada                                                                                                                                                                                                         | Not at all                                                                                                                                           |
| Slightly                                                                                                                                  | Ligeramente                                                                                                                                           | Un poco                                                                                                                                                       |                                                                                                  | Un poco                                                                                                                                                                                                         |                                                                             | Un poco                                                                                                                                                                                                      | Slightly                                                                                                                                             |
| Moderately                                                                                                                                | Moderadamente                                                                                                                                         | Moderadamente                                                                                                                                                 |                                                                                                  | Moderadamente                                                                                                                                                                                                   |                                                                             | Moderadamente                                                                                                                                                                                                | Moderately                                                                                                                                           |
| Very much                                                                                                                                 | Mucho                                                                                                                                                 | Mucho                                                                                                                                                         |                                                                                                  | Mucho                                                                                                                                                                                                           |                                                                             | Mucho                                                                                                                                                                                                        | Very much                                                                                                                                            |
| Extremely                                                                                                                                 | Extremadamente                                                                                                                                        | Extremadamente                                                                                                                                                |                                                                                                  | Extremadamente                                                                                                                                                                                                  |                                                                             | Extremadamente                                                                                                                                                                                               | Extremely                                                                                                                                            |
